# Supplementary material for: Nanocellulose, the Green Biopolymer Trending in Pharmaceuticals: A Patent Review
Source: MDPI journal article supplement (doi:10.3390/pharmaceutics16010145), 2024-01-21
Supplement: s1 [file s1]

*Review*

# Nanocellulose, the Green Biopolymer Trending in Pharmaceuticals: A Patent Review

**Keth Ribeiro Garcia <sup>1</sup>, Ruy Carlos Ruver Beck <sup>1</sup>, Rosmary Nichele Brandalise <sup>2</sup>, Venina dos Santos <sup>2</sup> and Letícia Scherer Koester <sup>1,\*</sup>**

<sup>1</sup> Programa de Pós-Graduação em Ciências Farmacêuticas, Faculdade de Farmácia, Universidade Federal do Rio Grande do Sul (UFRGS), Porto Alegre 90610-000, Brazil; k1rgarcia@gmail.com (K.R.G.); ruy.beck@ufrgs.br (R.C.R.B.)

<sup>2</sup> Programa de Pós-Graduação em Engenharia de Processos e Tecnologias, Universidade de Caxias do Sul (UCS), Caxias do Sul 95070-560, Brazil; rnbranda@ucs.br (R.N.B.); vsantos2@ucs.br (V.d.S.)

\* Correspondence: leticia.koester@ufrgs.br; Tel.: +55-51-33085278

## Supplementary material

**Table S1.** Patents separated by clusters after examination of documents obtained in WIPO, Espacenet, and Lens.org databases, comprising the timeframe between 2011 – Aug., 2023, with the search terms “nanofibrillar cellulose”, “nanofibrillated cellulose”, “cellulose nanofibers”, “microfibrillated cellulose”, “cellulose nanocrystals”, “nanocrystalline cellulose”, “nanocellulose”, “pharmaceutical”, “excipient”, and “drug delivery” combined with Boolean operator and truncation symbol.

| <i>Cluster</i>         | <i>Patent number</i> |                    |                    |
|------------------------|----------------------|--------------------|--------------------|
| Design & Manufacturing | US 2018/0094081 A1   | US 2020/0032454 A1 | US 2023/0220118 A1 |
| • Manufacture          | US 10626191 B2       | EP 3382095 A1      | US 11572418 B2     |
|                        | WO 2016/177395 A1    | WO 2018/177878 A1  | EP 3947533 B1      |
|                        | US 10626191 B2       | US 2019/0298838 A1 | US 2023/0151545 A1 |
|                        | WO 2019/238327 A1    | WO 2016/109479 A1  | US 11649296 B2     |
|                        | US 2021/0130500 A1   | US 2016/0184438 A1 | US 11649333 B2     |
|                        | EP 3581591 A1        | EP 3212676 B1      | EP 3533458 B1      |
|                        | US 2021/0077403 A1   | WO 2020/075057 A1  | US 11602566 B2     |
|                        | EP 3791864 A1        | US 2019/0040581 A1 | US 11634549 B2     |
|                        | WO 2016/102767 A1    | US 10883226 B2     | US 11572450 B2     |
|                        | US 2018/0179703 A1   | WO 2017/134334 A1  | US 11549085 B2     |
|                        | US 10822743 B2       | EP 3574143 B1      | US 2022/0387955 A1 |
|                        | WO 2016/193548 A1    | US 2020/0023409 A1 | WO 2022/249052 A1  |
|                        | WO 2017/174874 A1    | WO 2018/138702 A1  | EP 4094827 A1      |
|                        | EP 3228329 A1        | WO 2020/058803 A1  | US 2022/0389121 A1 |
|                        | US 2019/0111175 A1   | WO 2020/075056 A1  | US 11440974 B2     |
|                        | WO 2016/128620 A1    | WO 2019/123405 A1  | US 2022/0389261 A1 |
|                        | US 2018/0021473 A1   | WO 2019/073370 A1  | US 11511015 B2     |
|                        | US 10729804 B2       | US 2021/0207324 A1 | US 2022/0349651 A1 |
|                        | US 2021/0205490 A1   | US 2019/0234020 A1 | EP 4083112 A1      |
|                        | WO 2017/115018 A1    | US 10927504 B2     | US 2022/0275583 A1 |
|                        | EP 3187195 A1        | WO 2017/221137 A1  | US 2022/0249378 A1 |
|                        | EP 3187195 B1        | EP 3475485 B1      | US 2022/0233412 A1 |
|                        | EP 3077592 B1        | WO 2010/092239 A1  | US 2022/0213298 A1 |
|                        | WO 2015/082774 A1    | US 9181653 B2      | US 2022/0186049 A1 |
|                        | EP 3077592 B2        | US 2014/0182797 A1 | US 2022/0185976 A1 |
|                        | US 10214855 B2       | US 2020/0086604 A1 | US 2022/0177661 A1 |
|                        | US 2016/0289894 A1   | WO 2018/189698 A1  | US 2022/0177660 A1 |
|                        | US 2017/0190799 A1   | WO 2019/171279 A1  | EP 3228329 B1      |
|                        | US 10113006 B2       | WO 2020/102605 A1  | WO 2022/097095 A1  |
|                        | WO 2015/197906 A1    | WO 2011/030170 A1  | US 11324701 B2     |
|                        | WO 2016/024046 A1    | WO 2021/123499 A1  | EP 3970945 A1      |
|                        | EP 3350368 B1        | US 10813377 B2     | US 2022/0025147 A1 |
|                        | US 2017/0218567 A1   | CA 3003670 A1      | US 2022/0018060 A1 |
|                        | US 10570564 B2       | US 2021/0045422 A1 |                    |
|                        | WO 2017/046455 A1    | WO 2017/075417 A1  |                    |
|                        | RU 2719165 C1        | US 2018/0319957 A1 |                    |
|                        | WO 2017/103328 A1    | CN 108430237 A     |                    |
|                        | US 10640632 B2       | CA 3003670 C       |                    |
|                        | US 2018/0371211 A1   | WO 2017/105337 A1  |                    |
|                        | CN 103520739 A       | US 2018/0291119 A1 |                    |
|                        | US 9611586 B2        | US 11084885 B2     |                    |
|                        | US 2014/0323714 A1   | US 2020/0157250 A1 |                    |
|                        | EP 2782937 B1        | WO 2018/231143 A1  |                    |
|                        | US 10570564 B2       | WO 2020/227816 A1  |                    |
|                        | EP 3581590 A1        | WO 2020/201627 A1  |                    |
|                        | WO 2013/076376 A1    | US 9970159 B2      |                    |
|                        | US 10113005 B2       | US 2018/0044856 A1 |                    |
|                        | EP 2935446 B1        | WO 2018/013034 A1  |                    |
|                        | US 2015/0322170 A1   | WO 2021/229406 A1  |                    |
|                        | WO 2014/096547 A1    | US 11174324 B2     |                    |

|                                          |                    |                    |                    |
|------------------------------------------|--------------------|--------------------|--------------------|
| • Process                                | US 10625232 B2     | US 2021/0127663 A1 | WO 2019/116245 A1  |
|                                          | WO 2016/102766 A1  | WO 2018/108341 A1  | WO 2012/152997 A1  |
|                                          | US 2017/0348662 A1 | EP 3335696 B1      | US 2014/0130710 A1 |
|                                          | EP 3237108 B1      | EP 3335696 A1      | EP 4201963 A1      |
|                                          | US 2021/0229057 A1 | WO 2018/109282 A1  | WO 2023/084383 A1  |
|                                          | US 2017/0348663 A1 | US 2019/0343889 A1 | EP 3331939 B1      |
|                                          | WO 2016/102764 A1  | WO 2010/102802 A1  | US 11555186 B2     |
|                                          | US 10981135 B2     | US 10017583 B2     | EP 4083113 A1      |
|                                          | EP 3237107 B1      | US 2016/0130368 A1 | US 2022/0325003 A1 |
|                                          | US 2020/0078305 A1 | WO 2014/195971 A1  | US 11421118 B2     |
|                                          | WO 2018/109281 A1  | EP 2812483 B2      | WO 2022/006644 A1  |
|                                          | WO 2016/102765 A1  | US 2014/0374045 A1 |                    |
|                                          | US 2017/0368211 A1 | EP 2812483 B1      |                    |
|                                          | US 10322196 B2     | US 2016/0186376 A1 |                    |
|                                          | EP 3237025 B1      | US 9315942 B2      |                    |
|                                          | EP 3335695 A1      | WO 2013/117823 A1  |                    |
|                                          | EP 3335695 B1      | US 9725849 B2      |                    |
| <hr/>                                    |                    |                    |                    |
| Cell culture systems and cell technology | US 2020/0385660 A1 | US 2020/0164103 A1 | WO 2023/012333 A2  |
|                                          | EP 3750982 A1      | WO 2016/100856 A1  | EP 4119657 A1      |
|                                          | US 2021/0214510 A1 | EP 3233493 B1      | EP 4082587 A1      |
|                                          | EP 3572434 A1      | US 2020/0206385 A1 | EP 3684433 B1      |
|                                          | EP 3669651 A1      | US 2017/0368225 A1 | WO 2022/207889 A1  |
|                                          | US 2020/0199536 A1 | US 10675379 B2     | WO 2022/144489 A1  |
|                                          | WO 2020/260741 A1  | EP 3418377 A1      | EP 4023744 A1      |
|                                          | WO 2021/127373 A1  | WO 2018/234634 A1  | US 2022/0213432 A1 |
|                                          | EP 3234600 B1      | US 2020/0115678 A1 | US 2022/0214329 A1 |
|                                          | US 2021/0190765 A1 | CA 3140249 A1      | EP 3967748 A1      |
|                                          | US 10976308 B2     | US 11186736 B2     | US 11332714 B2     |
|                                          | WO 2016/097490 A1  | US 2021/0179871 A1 | AU 2020/312637 A1  |
|                                          | US 2018/0024121 A1 | EP 2975115 A1      | AU 2020/313511 A1  |
|                                          | EP 2900806 B1      | EP 3669651 B1      | CN 114127279 A     |
|                                          | WO 2014/049204 A1  | WO 2023/113685 A1  | CN 114080242 A     |
|                                          | EP 3699264 A1      | EP 3699264 B1      | MX 2021015757 A    |
|                                          | US 2015/0267164 A1 | US 2023/0082321 A1 | MX 2021015722 A    |
|                                          | US 9593304 B2      | EP 4148071 A1      |                    |
| <hr/>                                    |                    |                    |                    |
| Drug delivery                            |                    |                    |                    |
| • Injectable                             | CA 3101156 A1      | WO 2012/056111 A2  |                    |
|                                          | US 2021/0085602 A1 | EP 2632493 B1      |                    |
|                                          | JP 2021046393 A    | US 2013/0330379 A1 |                    |
|                                          | EP 3791858 A1      | US 9631177 B2      |                    |
|                                          |                    | US 2022/0257753 A1 |                    |
| • Oral                                   | WO 2021/071974 A1  | WO 2021/116917 A1  |                    |
|                                          | CN 112336741 A     | WO 2018/009139 A1  |                    |
|                                          | US 2021/0030782 A1 | WO 2013/009253 A1  |                    |
|                                          | WO 2019/094769 A1  | CN 115400101 A     |                    |
|                                          |                    | CN 114732801 A     |                    |
| • Buccal                                 | WO 2018/104971 A1  |                    |                    |
|                                          | WO 2018/152627 A1  |                    |                    |
|                                          | US 2020/0281868 A1 |                    |                    |
|                                          | US 11478435 B2     |                    |                    |
| • Topical                                | WO 2020/031186 A1  | WO 2018/009113 A1  |                    |
|                                          | US 9816230 B2      | US 2020/0188538 A1 |                    |
|                                          | US 2016/0186377 A1 | WO 2017/117650 A1  |                    |
|                                          | WO 2018/009112 A1  | WO 2020/227814 A1  |                    |
| • Transdermal                            | WO 2021/108722 A1  |                    |                    |
|                                          | US 2020/0375878 A1 |                    |                    |
|                                          | EP 3730122 A2      |                    |                    |

|                    |                    |                    |
|--------------------|--------------------|--------------------|
| • Matrix           | WO 2013/072563 A1  |                    |
|                    | US 2014/0322327 A1 |                    |
|                    | US 2021/0015121 A1 |                    |
|                    | WO 2019/108887 A1  |                    |
|                    | US 2020/0254046 A1 |                    |
|                    | WO 2018/015175 A9  |                    |
|                    | WO 2018/015175 A1  |                    |
|                    | WO 2023/009976 A1  |                    |
|                    | US 2023/0028624 A1 |                    |
|                    | US 2023/0017712 A1 |                    |
|                    | US 11389537 B2     |                    |
| Wound healing      | EP 3771470 A1      | US 2013/0330417 A1 |
|                    | US 2021/0030919 A1 | WO 2017/103263 A1  |
|                    | WO 2019/166606 A1  | EP 3181152 A1      |
|                    | EP 3533458 A1      | US 2016/0325011 A1 |
|                    | US 2021/0170041 A1 | EP 3088008 A1      |
|                    | EP 3816338 A1      | EP 3402462 B1      |
|                    | US 2021/0128365 A1 | WO 2017/122224 A1  |
|                    | WO 2018/109275 A1  | US 2019/0015468 A1 |
|                    | EP 3335740 A1      | US 10426809 B2     |
|                    | US 2019/0336643 A1 | WO 2018/130390 A1  |
|                    | US 2014/0213764 A1 | US 11173228 B2     |
|                    |                    | WO 2023/118589 A1  |
|                    |                    | US 2023/0181791 A1 |
|                    |                    | US 11534526 B2     |
| Tissue engineering | WO 2020/249814 A1  | US 2023/0226098 A1 |
|                    | US 2021/0069964 A1 | WO 2023/133517 A1  |
|                    | US 2021/0138113 A1 | WO 2023/118966 A1  |
|                    | WO 2019/211854 A1  | US 11602579 B2     |
|                    | WO 2020/249814 A1  | US 2022/0249738 A1 |
|                    | WO 2019/122351 A1  | US 2022/0145259 A1 |
|                    | US 2019/0015550 A1 | WO 2022/003203 A1  |
|                    | US 11103617 B1     | EP 3932437 A1      |
|                    | US 11167062 B2     |                    |
|                    | US 11713444 B2     |                    |

**Table S2.** Patents separated by clusters after examination of documents obtained in WIPO, Espacenet, and Lens.org databases, comprising the timeframe between 2011 - Aug., 2023, with the search terms “bacterial nanocellulose”, “pharmaceutical”, “excipient”, and “drug delivery” combined with Boolean operator and truncation symbol.

| <i>Cluster</i>         | <i>Patent number</i> |                    |
|------------------------|----------------------|--------------------|
| Design & Manufacturing | WO 2020/136629 A1    | US 2019/0060205 A1 |
| • Manufacture          | US 10975242 B2       | WO 2012/106707 A3  |
|                        | US 10982387 B2       | US 2013/0309295 A1 |
|                        | JP 2021065224 A      | WO 2012/106707 A2  |
|                        | CN 109223727 A       | KR 20200085090 A   |
|                        | WO 2021/009021 A1    | US 2021/0015966 A1 |
|                        | WO 2021/009038 A1    | WO 2023/108017 A2  |
|                        |                      | WO 2023/070028 A1  |
|                        |                      | WO 2023/048674 A1  |
|                        |                      | WO 2022/200631 A1  |
| • Process              | US 10870950 B2       |                    |
|                        | WO 2017/165465 A1    |                    |
|                        | US 2021/0071366 A1   |                    |
|                        | US 2019/0093288 A1   |                    |
|                        | WO 2023/089010 A1    |                    |
| Drug delivery          |                      |                    |
| • Intraocular          | US 2013/0011385 A1   |                    |
|                        | US 8940337 B2        |                    |
|                        | WO 2011/079380 A1    |                    |
| • Oral                 | CN 103191441 A       |                    |
|                        | CN 102743356 A       |                    |
| • Topical              | CN 210673549 U       | US 2018/0303726 A1 |
|                        | US 2011/0039744 A1   | US 2020/0364264 A1 |
|                        | WO 2011/019876 A2    | EP 3812494 A1      |
|                        | US 8097574 B2        | US 2021/0140100 A1 |
|                        | US 10736823 B2       | US 2011/0286948 A1 |
|                        | EP 3380072 B1        | US 8772003 B2      |
|                        | WO 2017/089005 A1    |                    |
| • Transdermal          | CN 106074458 A       |                    |
| • Matrix               | US 2012/0308649 A1   |                    |
|                        | US 8871743 B2        |                    |
|                        | WO 2020/058836 A1    |                    |
| Wound healing          | CN 111265709 A       | US 9314531 B2      |
|                        | US 9211256 B2        | US 2012/0231038 A1 |
|                        | US 2016/0074520 A1   |                    |
| Tissue engineering     | US 2018/0298370 A1   | CN 105031722 A     |
|                        | WO 2016/174104 A1    | US 2016/0354406 A1 |
|                        | RO 130767 A0         | US 10130653 B2     |
|                        | US 10767205 B2       | WO 2021/245324 A1  |
